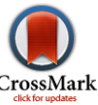

# Phenotypic Plasticity of the Introduced New Zealand Mud Snail, *Potamopyrgus antipodarum*, Compared to Sympatric Native Snails

Edward P. Levri<sup>1\*</sup>, Amy C. Krist<sup>2</sup>, Rachel Bilka<sup>1</sup>, Mark F. Dybdahl<sup>3</sup>

**1** Division of Math and Sciences, Penn State – Altoona, Altoona, Pennsylvania, United States of America, **2** Department of Zoology & Physiology and Program in Ecology, University of Wyoming, Laramie, Wyoming, United States of America, **3** Department of Biological Sciences, Washington State University, Pullman, Washington, United States of America

## Abstract

Phenotypic plasticity is likely to be important in determining the invasive potential of a species, especially if invasive species show greater plasticity or tolerance compared to sympatric native species. Here in two separate experiments we compare reaction norms in response to two environmental variables of two clones of the New Zealand mud snail, *Potamopyrgus antipodarum*, isolated from the United States, (one invasive and one not yet invasive) with those of two species of native snails that are sympatric with the invader, *Fossaria bulimoides* group and *Physella gyrina* group. We placed juvenile snails in environments with high and low conductivity (300 and 800 mS) in one experiment, and raised them at two different temperatures (16°C and 22°C) in a second experiment. Growth rate and mortality were measured over the course of 8 weeks. Mortality rates were higher in the native snails compared to *P. antipodarum* across all treatments, and variation in conductivity influenced mortality. In both experiments, reaction norms did not vary significantly between species. There was little evidence that the success of the introduced species is a result of greater phenotypic plasticity to these variables compared to the sympatric native species.

**Citation:** Levri EP, Krist AC, Bilka R, Dybdahl MF (2014) Phenotypic Plasticity of the Introduced New Zealand Mud Snail, *Potamopyrgus antipodarum*, Compared to Sympatric Native Snails. PLoS ONE 9(4): e93985. doi:10.1371/journal.pone.0093985

**Editor:** Peter Alan Todd, National University of Singapore, United States of America

**Received:** December 18, 2013; **Accepted:** March 12, 2014; **Published:** April 3, 2014

**Copyright:** © 2014 Levri et al. This is an open-access article distributed under the terms of the Creative Commons Attribution License, which permits unrestricted use, distribution, and reproduction in any medium, provided the original author and source are credited.

**Funding:** This work was financially supported through grants from Penn State Altoona. The funders had no role in study design, data collection and analysis, decision to publish, or preparation of the manuscript.

**Competing Interests:** The authors have declared that no competing interests exist.

\* E-mail: epl1@psu.edu

## Introduction

Phenotypic plasticity has long been thought to underlie the ability of a species to colonize new environments or communities and become invasive (i.e., geographically widespread and ecologically dominant) [1]. There have been two primary approaches to studying phenotypic plasticity in invasives: 1) comparing the reaction norms of invasive populations to non-invasive populations of the same species to demonstrate the evolution of phenotypic plasticity as an adaptive trait for invasions, and 2) comparing the phenotypic plasticity of invasive populations to competing native populations [2]. Demonstrating greater phenotypic plasticity in invaders generally suggests that phenotypic plasticity is a preadaptation for invasion success. A large number of studies have measured the plasticity of invasive plants relative to non-invasive or native species, generally finding that invasive species have greater plasticity (reviewed in [2]). Richards et al. [2] proposed several hypotheses about the form of fitness-related phenotypic plasticity in successful invasive species compared to native species. Relative to native species, phenotypic plasticity of invasive species may facilitate invasion success by maintaining high fitness despite stressful conditions, achieving higher fitness in favorable conditions, or permitting higher fitness or tolerance under a broader set of conditions [2]. Under each of these possible reaction norms (forms of plasticity), invasive organisms maintain higher mean fitness than natives.

The New Zealand mud snail, *Potamopyrgus antipodarum*, has been introduced in the United States [3,4,5] and around the world [6]. Phenotypic plasticity may play a role in the environments where *P. antipodarum* is invasive. The snail is known to behave differently in the presence and absence of fish predators [7] and snails from different populations respond to fish predators differently [8]. Significant variation also exists between invasive and native clones in their growth rates at various salinities with invasive clones maintaining greater fitness at higher salinities [9]. Also, Dybdahl and Kane [10] demonstrated significant plasticity in fitness across temperatures. Other experiments have indicated that shell shape is in part phenotypically plastic in invasive populations and may be important in conforming to stream flow variation [11]. Directly and indirectly, these studies suggest that multiple traits in *P. antipodarum* demonstrate phenotypic plasticity, and some studies show that invasive populations appear more plastic than populations of *P. antipodarum* from the native range (New Zealand). However, whether invasion success results from greater plasticity of *P. antipodarum* compared to native species has not been tested in this system.

At least two different clones of the New Zealand mud snail currently exist in rivers and streams of the western US where they have been established since at least 1987 [12]. One clone (US1) is invasive, inhabiting all of the western US states except for New Mexico and causes ecological disruption [13,14], while another

clone is not apparently invasive (US3), with a restricted distribution in the Snake River in Idaho where its range has not expanded significantly since its identification around 2005 [15]. In the Greater Yellowstone Area, the invasive clone (US1) is sympatric with two native pulmonate snails in many streams and can occur on the same rocks and submerged macrophytes (Krist, unpublished data). The native snail *Physella* (*Physella*) *gyrina* group (Physidae) is widespread in the Greater Yellowstone Area whereas the distribution of the other native *Fossaria* (*Bakerilymnaea*) *bulimoides* group (Lymnaeidae) is more restricted (Krist, unpublished data). The ecological similarity of the introduced and native snails is also exhibited by their diets. *P. antipodarum* consumes primarily periphyton (organic biofilm on rocks and vegetation) [16,17] and fine organic matter [16], and both *Fossaria* (Thon and Krist, unpublished data) and *Physella* (reviewed in [18]) are known to consume periphyton.

In two experiments, we addressed whether differences in phenotypic plasticity between the non-native *P. antipodarum* and two native species in response to conductivity and temperature may have contributed to the invasion success of *P. antipodarum*. We chose conductivity and temperature because both abiotic factors affect growth and survival of New Zealand mud snails [10,19], and temperature also affects reproduction [10]. Specifically, we compared reaction norms (the range of phenotypes an individual exhibits across environments) of growth rate and survival between two clones, one invasive (US1) and one non-invasive (US3) with the reaction norms of the two native snails. If phenotypic plasticity in response to conductivity or temperature contribute to the invasion success of the successful invasive clone, then we expect the reaction norm for fitness-related traits of the invasive clone to differ from the non-invasive clone and probably from the two native species as well, contributing to greater tolerance to stressful or more variable conditions [2].

## Methods

In June 2010, we collected the US1 clone of *P. antipodarum*, the widespread invasive, from Polecat Creek in the Rockefeller National Parkway, WY and the two native snail species, *Fossaria* (*Bakerilymnaea*) *bulimoides* group and *Physella* (*Physella*) *gyrina* group, from ~3 km upstream in an unnamed tributary of Polecat Creek. US3, the non-invasive clone, was originally collected from the Snake River. None of the snails that we used in our experiments are an endangered or protected species, and necessary permits were granted by Grand Teton National Park (United States National Park Service). The experiments were conducted at the Red Buttes Environmental Laboratory at the University of Wyoming.

We conducted two experiments, one where snails of each type were exposed to two different conductivities and one where the snails were exposed to two different temperatures. For each treatment of each experiment, we housed twenty juvenile snails of each *P. antipodarum* clone (US1 and US3) and the two native snails (*Fossaria* and *Physella*) individually in 100 ml glass beakers for a total of 80 juveniles of each snail type (two clones of *P. antipodarum*, *Physella*, and *Fossaria*). Snails were housed singly in a 100 ml beaker and fed 0.96 mg of *Spirulina* powder (Argent Laboratories) three times per week. Thus twenty snails of each type were exposed to each treatment in each experiment. Snails were housed under controlled light (12:12-h light:dark cycle). We measured shell length using an ocular micrometer in a dissecting microscope by noting the distance from the apex of the shell to the furthest edge of the aperture when the aperture of the snail was facing up (0.1 mm resolution). The initial size ranges of the juvenile snails

were 1.04–2.02 mm for US1, 1.23–2.20 mm for US3, 3.17–4.76 mm for *Fossaria*, and 2.56–4.59 mm for *Physella*. New Zealand mud snails very rarely become reproductively mature at <2.5 mm in shell length [20]. For *Fossaria*, we used the same size range as we had used in another experiment measuring *Fossaria* growth (Thon et al. in prep.). For *Physella*, we collected the smallest ~20% of individuals at the study site to ensure that we included only juvenile individuals. The initial size distributions for US1 and US3 were compared using ANOVA and were not significantly different. At the beginning of the experiment and weekly thereafter for eight weeks, we measured shell length under a dissecting microscope. Three times a week we changed water in the beakers and noted all mortality. We were confident that we could assess growth rate in all species because the duration of our experiments, eight weeks, greatly exceeded previous studies where we have measured growth in *P. antipodarum* (e.g. [21] 18 days) and in *Fossaria* (Thon et al. unpublished data; 21 days).

In the conductivity experiment we produced low (300  $\mu$ S) and high (800  $\mu$ S) conductivity levels because this range is typical of normal levels in freshwater habitats where these species exist (<http://www.kimberly.uidaho.edu/midsnake/>; Dybdahl et al. unpublished data). We used spring water (pH = 7.85, 192 ppm CaCO<sub>3</sub>) with conductivity of 800  $\mu$ S to obtain high conductivity, and we diluted the spring water with distilled water to obtain the low conductivity treatment of 300  $\mu$ S.

In the temperature experiment, we used two different temperatures (16°C, 22°C) with 16°C being the year round temperature where the US1 clone was collected (Riley and Dybdahl, unpublished data) and 22°C known to be relatively stressful [10]. Previous work suggests that 16°–18°C are favorable temperatures for *P. antipodarum* [10]. We also expect the higher temperature to reflect the effects of climate change as reduced precipitation in the Greater Yellowstone Area [22] should increase temperatures in streams and other surface waters. We controlled water temperature by immersing the beakers housing the snails in thermostat-controlled water baths (Boeckel Industries Inc., Model 148007).

All statistical analyses were performed using IBM SPSS Statistics v. 20. We analyzed survival rates in both experiments using log-linear analysis with a backwards elimination procedure with proportion surviving as the dependent variable and snail type and treatment as independent variables. We first used a fully factorial model and then used planned contrasts to compare the survival rate of the US1 clone of *P. antipodarum* to US 3 and the two native species for both conductivity and temperature. For the planned contrasts, we adjusted the critical P-value to 0.017 to accommodate the three additional contrasts per analysis. We planned contrasts to the US1 clone because it is the invasive clone. Specific growth rates (SGR) were calculated for each snail type in each treatments using the formula  $SGR = \ln(\text{final length}/\text{initial length})/\text{days of experiment}$ . To compare specific growth rates in each experiment we utilized two-way ANOVA with snail type and treatment as independent variables. We used a fully factorial model and then compared each snail type to the US1 clone of *P. antipodarum* using post-hoc comparisons with Tukey's honest significant differences. If the homogeneity of variances assumption was violated a weighted ANOVA was performed by weighting the data using the inverse square root of the variances of each factor group [23].

## Results

**Conductivity:** The fully factorial model revealed a significant effect of snail type on specific growth rates (Table I) with the *P.*

**Table 1.** Results of Univariate ANOVA comparing the specific growth rate of two clones of *P. antipodarum* and two native snails in the conductivity experiment.

| Source                 | df         | F         | P       |
|------------------------|------------|-----------|---------|
| Intercept              | 1          | 117.37    | <0.0005 |
| Snail type             | 3          | 9.692     | <0.0005 |
| Treatment              | 1          | 0.019     | = 0.892 |
| Snail type x Treatment | 3          | 0.638     | = 0.592 |
| Error                  | 54         |           |         |
| Tukey HSD              | Mean Diff. | Std. Err. | P       |
| US1 vs US3             | -0.0011    | 0.0004    | = 0.040 |
| US1 vs <i>Fossaria</i> | -0.0027    | 0.0006    | <0.0005 |
| US1 vs <i>Physella</i> | -0.0022    | 0.0006    | = 0.002 |

A post hoc Tukey's honest significant differences procedure was performed to specifically compare the specific growth rates of the invasive US1 clone to each other snail type.

doi:10.1371/journal.pone.0093985.t001

*antipodarum* clones generally growing slower than the two native species (Figure 1a). However, we found no evidence of effects of the conductivity treatments or a conductivity by snail type interaction. When specifically comparing the US1 and US3 clones, the US3 clone had a significantly higher specific growth rate than the US1 clone (Table I; Figure 1a). Both native snails grew at a significantly greater rate than the *Potamopyrgus* US1 clone (Table I).

For survival, the fully factorial model showed effects of snail type ( $X^2 = 18.207$ , d.f. = 1,  $P < 0.0005$ ) and conductivity treatment on survival ( $X^2 = 5.085$ , d.f. = 1,  $P = 0.024$ ), but no significant treatment by snail type interaction ( $X^2 = 4.662$ , d.f. = 3,  $P = 0.198$ ) (Figure 1b). When comparing US1 to US3, the survival rate of the two introduced clones of *P. antipodarum* was not influenced by conductivity ( $X^2 = 2.279$ , d.f. = 1,  $P = 0.131$ ), nor was there a significant three-way interaction between snail type, survival and conductivity treatment ( $X^2 = 0.688$ , d.f. = 1,  $P = 0.407$ ). Thus we detected no difference in phenotypic plasticity between US1 and US3 in response to conductivity. Comparing US1 to *Fossaria*, the US1 clone survived at a significantly greater rate overall ( $X^2 = 5.81$ , d.f. = 1,  $P = 0.016$  [ $P_{crit} = 0.017$ ]), but there was no effect of conductivity on survival ( $X^2 = 0.985$ , d.f. = 1,  $P = 0.321$  [ $P_{crit} = 0.017$ ]) nor a conductivity by snail type interaction ( $X^2 = 1.609$ , d.f. = 1,  $P = 0.205$  [ $P_{crit} = 0.017$ ]). Similarly, when comparing the US1 clone to *Physella*, we found that the US1 clone survived at a significantly greater rate overall ( $X^2 = 17.27$ , d.f. = 1,  $P < 0.0005$  [ $P_{crit} = 0.017$ ]), and the higher conductivities increased survival ( $X^2 = 7.495$ , d.f. = 1,  $P = 0.006$  [ $P_{crit} = 0.017$ ]). However there was no significant treatment by snail type interaction ( $X^2 = 0.246$ , d.f. = 1,  $P = 0.620$  [ $P_{crit} = 0.017$ ]).

Temperature: The fully factorial model indicated a significant effect of snail type on the specific growth rate, but we found no effect of temperature treatment nor a snail by treatment interaction (Table II). Specific comparisons showed no difference in growth rates between the US1 and US3 clones (Table II; Figure 1c), and both native snails grew at a greater rate than the US1 clone (Table II).

The different snail types survived at different rates according to a fully factorial model ( $X^2 = 30.955$ , d.f. = 3,  $P < 0.0005$ ). In general, the *P. antipodarum* clones survived better than the two native species (Figure 1d). However, the temperature treatment had little effect on survival ( $X^2 = 0.001$ , d.f. = 1,  $P = 1.00$ ), and we did not detect a temperature by snail type interaction ( $X^2 = 0.001$ , d.f. = 3,  $P = 1.00$ ).

The US1 and US3 clones did not differ in survival ( $X^2 = 0.394$ , d.f. = 1,  $P = 0.530$  [ $P_{crit} = 0.017$ ]), nor did they differ in survival in response to the temperature treatments ( $X^2 = 0.396$ , d.f. = 1,  $P = 0.529$  [ $P_{crit} = 0.017$ ]), nor was there any evidence of a genotype by environment interaction ( $X^2 = 0.008$ , d.f. = 1,  $P = 0.929$  [ $P_{crit} = 0.017$ ]). Comparisons of the US1 clone to both native snails were very similar: US1 had a significantly greater survival rate than both native snails (*Fossaria*,  $X^2 = 24.88$ , d.f. = 1,  $P < 0.0005$  [ $P_{crit} = 0.017$ ]; *Physella*,  $X^2 = 5.77$ , d.f. = 1,  $P = 0.016$  [ $P_{crit} = 0.017$ ]) but the temperature treatments did not affect survival of any of the snails (*Fossaria*,  $X^2 = 0.475$ , d.f. = 1,  $P = 0.491$  [ $P_{crit} = 0.017$ ]; *Physella*,  $X^2 = 0.623$ , d.f. = 1,  $P = 0.430$  [ $P_{crit} = 0.017$ ]) nor was there a significant temperature by snail type interaction for either comparison (*Fossaria*,  $X^2 = 1.337$ , d.f. = 1,  $P = 0.248$  [ $P_{crit} = 0.017$ ]; *Physella*,  $X^2 = 0.001$ , d.f. = 1,  $P = 0.985$  [ $P_{crit} = 0.017$ ]).

## Discussion

Conductivity and temperature influence the distribution and abundance of gastropods [24], so we exposed introduced, invasive and native snails to different levels of these two environmental variables to determine whether phenotypic plasticity contributes to invasion success. We found no evidence for differences in phenotypic plasticity among two clones of the introduced snail *P. antipodarum* and two native snail species. The relatively parallel reaction norms for snail growth and survival (Figure 1), as demonstrated by the non-significant snail type by treatment interaction effects, suggest that both the invasive and the more restricted clones of the introduced species and the two native snails did not differ in their response to our experimental levels of conductivity and temperature.

As expected, we found a significant effect of conductivity level on survival, but surprisingly, not on growth. Conductivity is a measure of the concentration of ions and is known to influence the distribution and composition of snail communities (e.g. [25,26]). At low conductivities, important ions crucial for snail growth and survival (e.g. calcium) are too dilute, and high conductivities can cause stressful osmotic pressure. Despite the significantly lower survival at low conductivity across the introduced, invasive, and native snails, all snail types responded similarly. The absence of a significant effect of conductivity on growth rates might indicate that the influence of conductivity is greatest on survival, and that

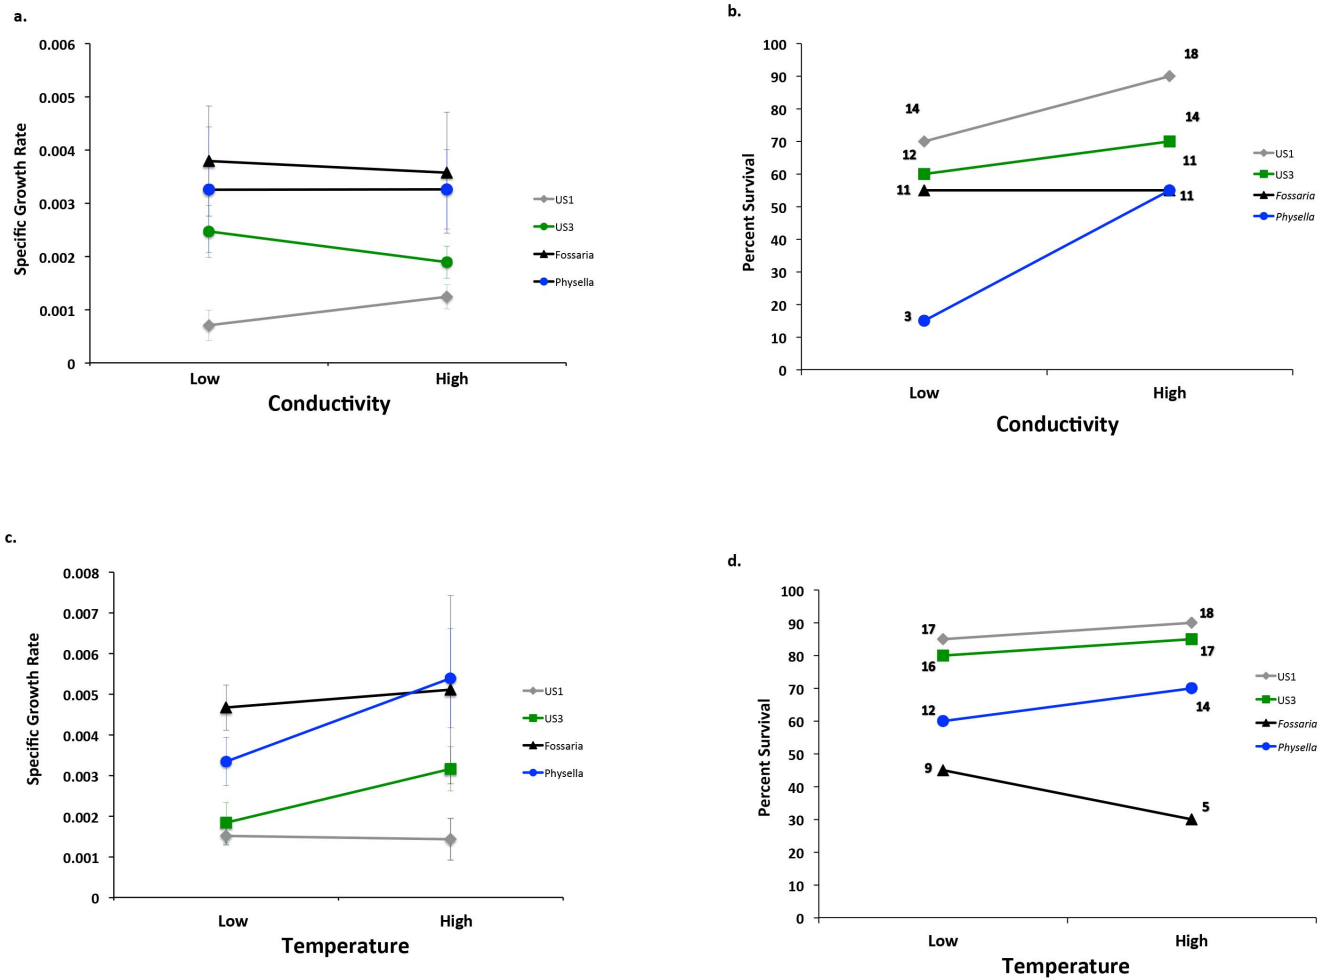

**Figure 1. The effect of variation in conductivity on snail specific growth rate (a) and mortality (b) and the effect of variation in temperature on the specific growth rate (c) and mortality (d).** Error bars for specific growth rates are standard errors of the mean. Numbers on the mortality figures indicate the number of surviving snails out of twenty. doi:10.1371/journal.pone.0093985.g001

**Table 2. Results of Univariate ANOVA comparing the specific growth rate of two clones of *P. antipodarum* and two native snails in the temperature experiment.**

| Source                 | df         | F         | P       |
|------------------------|------------|-----------|---------|
| Intercept              | 1          | 144.46    | <0.0005 |
| Snail type             | 3          | 10.257    | <0.0005 |
| Treatment              | 1          | 2.865     | = 0.094 |
| Snail type x Treatment | 3          | 1.230     | = 0.303 |
| Error                  | 54         |           |         |
| Tukey HSD              | Mean Diff. | Std. Err. | P       |
| US1 vs US3             | -0.0010    | 0.0005    | = 0.019 |
| US1 vs <i>Fossaria</i> | -0.0033    | 0.0007    | <0.0005 |
| US1 vs <i>Physella</i> | -0.0026    | 0.0006    | <0.0005 |

A post hoc Tukey's honest significant differences procedure was performed to specifically compare the specific growth rates of the invasive US1 clone to each other snail type. doi:10.1371/journal.pone.0093985.t002

the growth of surviving individuals was tolerant of low conductivity.

Surprisingly, all snail types responded similarly to experimental temperature conditions. Although *P. antipodarum* can survive temperatures as low as 4°C and as high as 32°C [31], temperature appears to be a limiting factor because populations of *P. antipodarum* exhibit winter population crashes [3,27,28,29]. Lab experiments showed that temperature has a strong effect on fitness [10,30]; the invasive clone US1 grows and reproduces best at intermediate temperatures around 18°C, and these traits respond strongly to variation around that optimum [10]. Consequently, our temperature treatments should have induced responses in growth or survival in these snail types. Nevertheless, the introduced, invasive, and native snails responded similarly to our temperature treatments, as demonstrated by the non-significant differences in reaction norms among them.

We expected the successfully invasive clone of *P. antipodarum* (US1) to possess a form of phenotypic plasticity that is either robust to harsh conditions, more opportunistic under good conditions, or better under all conditions [2]. First, we expected that the response to temperature or conductivity of the invasive US1 clone of *P. antipodarum* to differ from the US3 clone, which is introduced but restricted in its distribution. While the flat reaction norms (Figure 1) are consistent with the capacity of US1 to maintain higher fitness across experimental temperature or conductivity conditions, we found that US3 also possessed the same reaction norm. In fact, US3 was better under all conditions compared to US1; US3 either grew at the same rate (temperature experiment) or faster (conductivity experiment) than US1. Second, we also expected US1 to possess a different form of phenotypic plasticity than the two native species. For survival, both US1 and US3 survived at higher rates in both experiments than the native species, showing greater fitness under all conditions. For growth rate, *P. antipodarum* and the two native species might not be directly comparable because of differences in growth stage of experimental snails and size at maturity. However, it is possible to compare directly the reaction norms of the different species, yet we detected no

differences between the reaction norms of natives and non-natives in either experiment. These results, taken together, indicate little difference in the reaction norms among introduced, invasive and native snails under experimental temperature and conductivities.

Our goal was to expose snails to realistic environmental conditions to determine whether phenotypic plasticity plays a role in the success of an invasive genotype compared to a non-invasive genotype or native species. We did not find any evidence for significant variation among invasive, non-invasive, and native snails in the reaction norms under our experimental conductivity and temperature variation. It is possible that invasion success may be facilitated by an individual's ability to cope with a temporally changing environment, which we did not address since we maintained constant temperature and conductivity conditions in our treatments. Furthermore, the possibility exists that invasive *P. antipodarum* may demonstrate phenotypic plasticity with respect to other traits or abiotic or biotic variables not measured here that may be important in its invasion success. For example, the US1 genotypes differ in shell shape across populations, and shell shape represents a plastic response to stream water velocities [11]. This response, if different from those of native snails, might result in fitness advantages that help to explain invasion success.

## Acknowledgments

We thank David Legg for statistical assistance and Maureen Levri and three anonymous reviewers for helpful comments on earlier versions of this manuscript. We also thank Joe Bobbit and Steve Devries of the University of Wyoming, Department of Zoology and Physiology for logistical support and for providing space for the experiments.

## Author Contributions

Conceived and designed the experiments: EPL ACK RHB MFD. Performed the experiments: EPL ACK RHB MFD. Analyzed the data: EPL ACK RHB MFD. Contributed reagents/materials/analysis tools: ACK EPL. Wrote the paper: EPL ACK RHB MFD.

## References

- Baker HG (1965) Characteristics and modes of origin of weeds. pp. 147–168 in Baker HG and Stebbins GL (eds) *The Genetics of Colonizing Species*. New York: Academic Press.
- Richards CL, Bosdorf O, Muth NZ, Gurevitch J, Pigliucci M. (2006) Jack of all trades, master of some? On the role of phenotypic plasticity in plant invasions. *Ecology Letters* 9: 981–993.
- Zaranko DT, Farara DG, Thompson FG (1997) Another exotic mollusk in the Laurentian Great lakes: the New Zealand native *Potamopyrgus antipodarum* (Gray 1843) (Gastropoda, Hydrobiidae). *Canadian Journal of Fisheries and Aquatic Sciences* 54: 809–814.
- Proctor T, Kerans B, Clancey P, Ryce E, Dybdahl M, Gustafson D, Hall R, Pickett F, Richards D, Waldeck RD, Chapman J, Wiltshire RH, Becker D, Anderson M, Pitman B, Lassuy D, Heimowitz P, Dwyer P, Levri EP (2007) National Management and Control Plan for the New Zealand Mudsnail (*Potamopyrgus antipodarum*). [www.anstaskforce.gov/Documents/NZMS\\_MgmtControl\\_Final.pdf](http://www.anstaskforce.gov/Documents/NZMS_MgmtControl_Final.pdf)
- Levri EP, Dermott RM, Lunnen SJ, Kelly AA, Ladson T (2008) The distribution of the invasive New Zealand mud snail (*Potamopyrgus antipodarm*) in Lake Ontario. *Aquatic Ecosystem Health and Management* 11(4): 412–421.
- Alonso A and Castro-Diez P (2012) The exotic aquatic mud snail *Potamopyrgus antipodarum* (Hydrobiidae, Mollusca): state of the art of a worldwide invasion. *Aquatic Sciences* 74: 375–383.
- Levri EP (1998) Perceived predation risk, parasitism, and the foraging behavior of a freshwater snail (*Potamopyrgus antipodarum*). *Canadian Journal of Zoology* 76: 1878–1884.
- Levri EP, Dubensky AN, Mears AS, Opiela CA (2012) Interpopulation variation in predator avoidance behavior of a freshwater snail to the same predator. *Canadian Journal of Zoology* 90(5): 616–623.
- Drown DM, Levri EP, Dybdahl MF (2011) Invasive genotypes are opportunistic specialists not general purpose genotypes. *Evolutionary Applications* 4(1): 132–143.
- Dybdahl MF and Kane SL (2005) Adaptation vs. phenotypic plasticity in the success of a clonal invader. *Ecology* 86(6): 1592–1601.
- Kistner EJ and Dybdahl MF (2013) Adaptive responses and invasion: the role of plasticity and evolution in snail shell morphology. *Ecology and Evolution* 3(2): 424–436.
- Taylor DW (1987) Thousand Islands Preserve threatened and endangered snails. Unpublished report to the Nature Conservancy of Idaho.
- Hall RO, Dybdahl MF, VanderLoop MC (2006) Extremely high secondary production of introduced snails in rivers. *Ecological Applications* 16(3): 1121–1131.
- Riley LA, Dybdahl MF, Hall RO (2008) Invasive species impact: asymmetric interactions between invasive and endemic freshwater snails. *Journal of the North American Benthological Society*. 27(3): 509–520.
- Dybdahl MF and Drown DM (2011) The absence of genotypic diversity in a successful parthenogenetic invader. *Biological Invasions* 13: 1663–1672.
- Haynes A, Taylor BJR (1984) Food finding and food preference in *Potamopyrgus jenkinsi* (E.A. Smith) (Gastropoda: Prosobranchia). *Archiv fur Hydrobiologie* 100: 479–491.
- James MR, Hawes I, Weatherhead M, Stanger C, Gibbs M. (2000) Carbon flow in the littoral food web of an oligotrophic lake. *Hydrobiologia* 441: 93–106
- Dillon RT Jr. (2000) *The ecology of freshwater molluscs*. Cambridge: Cambridge University Press. 509 p.
- Herbst DB, Bogan MT, Lusardi RA (2008) Low Specific Conductivity Limits Growth and Survival of the New Zealand Mud Snail from the Upper Owens River, California. *Western North American Naturalist* 68: 324–333. doi:10.3398/1527-0904(2008)68[324:LSCGLA]2.0.CO;2.
- Levri EP, Lively CM (1996) The effects of size, reproductive condition, and parasitism on the foraging behaviour in a freshwater snail, *Potamopyrgus antipodarum*. *Animal Behaviour* 51: 891–901.
- Neiman M, Kay AD, Krist AC (2013) Sensitivity to phosphorus limitation increases with ploidy level in a New Zealand snail. *Evolution*. 67(5): 1511–1517.

22. Christensen JS, Wood AW, Voisin N, Lettenmaier DP, Palmer RN (2004) The effects of climate change on the hydrology and water resources of the Colorado River basin. *Climate Change* 62: 337–363.
23. Neter J, Wasserman W, Kutner MH (1990) *Applied linear statistical models*. Homewood, Illinois: Irwin Press. 1181 pages.
24. Brown KM (2001) Mollusca: Gastropoda. In *Ecology and Classification of North American Freshwater Invertebrates*, 2<sup>nd</sup> ed. Thorpe JH and Covich AP (eds) San Diego, CA: Academic Press.
25. Crowl TA and Schnell GD (1990) Factors determining population density and size distribution of a freshwater snail in stream: effects of spatial scale. *Oikos* 59(3): 359–367.
26. Horsak M, Hajek M, Dite D, Tichy L (2007) Modern distribution patterns of snails and plants in the western Carpathian spring fens: is it a result of historical development? *Journal of Molluscan Studies* 73: 53–60.
27. Talbot JM and Ward JC (1987) Macroinvertebrates associated with aquatic macrophytes in Lake Alexandrina, New Zealand. *New Zealand Journal of Marine and Freshwater Research* 21: 199–213.
28. Schreiber ESG, Glaister A, Quinn GP, Lake PS (1998) Life history and population dynamics of the exotic snail *Potamopyrgus antipodarum* (Prosobranchia: Hydrobiidae) in Lake Purrumbete, Victoria, Australia. *Marine and Freshwater Research* 49: 73–78.
29. Kerans BL, Dybdahl MF, Gangloff MM, Jannot JE. (2005) *Potamopyrgus antipodarum*: distribution, density, and effects on native macroinvertebrate assemblages in the Greater Yellowstone Ecosystem. *Journal of the North American Benthological Society* 24(1): 123–138.
30. Dalton BM (2006) How do species occupy novel ranges? The attributes of a worldwide clonal invader. M.S. Thesis, Washington State University.
31. Quinn JM, Steele GL, Hickey CW, Vickers ML (1994) Upper thermal tolerances of twelve New Zealand stream invertebrate species. *New Zealand Journal of Marine and Freshwater Research* 28: 391–397.
